# Supplementary material for: Molecular Level Structure of Biodegradable Poly(Delta-Valerolactone) Obtained in the Presence of Boric Acid
Source: MDPI journal article supplement (doi:10.3390/molecules23082034), 2018-08-14
Supplement: s1 [file s1]

# SUPPLEMENTARY MATERIAL

## Molecular level structure of biodegradable poly( $\delta$ -valerolactone) obtained in the presence of boric acid

Khadar Duale<sup>1\*</sup>, Magdalena Zięba<sup>1</sup>, Paweł Chaber<sup>1</sup>, Dany Jeanne Di Fouque<sup>2</sup>, Antony Memboeuf<sup>2</sup>, Cristian Peptu<sup>3,4</sup>, Iza Radecka<sup>5</sup>, Marek Kowalczyk<sup>1,5</sup> and Grażyna Adamus<sup>1\*</sup>

<sup>1</sup> Centre of Polymer and Carbon Materials, Polish Academy of Sciences, 34, M. Curie-Skłodowska St., 41-819 Zabrze, Poland; email: grazyna.adamus@cmpw-pan.edu.pl;

<sup>2</sup> CEMCA, Université de Bretagne Occidentale, 6 Av. Le Gorgeu, 29238 Brest Cedex 3, France; memboeuf@univ-brest.fr

<sup>3</sup> Polymer Institute, Slovak Academy of Sciences, Dúbravská cesta 9, 845 41 Bratislava 45, Slovakia; upolcris@savba.sk;

<sup>4</sup> “Petru Poni” Institute of Macromolecular Chemistry, Alee Grigore Gica Voda 41A, 700487 Iasi, Romania; cristian.peptu@icmpp.ro

<sup>5</sup> School of Biology, Chemistry and Forensic Science, Faculty of Science and Engineering, University of Wolverhampton, Wolverhampton WV1 1SB, UK; M.Kowalczyk@wlv.ac.uk

\* Correspondence: grazyna.adamus@cmpw-pan.edu.pl; kduale@cmpw-pan.edu.pl; Tel.: + 48 32 2716077

### The ESI-MS/MS analysis of Sample PVL1 using QqQ instrument

The ESI tandem mass spectrometry (ESI-MS/MS) experiments were performed using a Micromass/Waters QqQ Quattro II mass spectrometer equipped with a Z-spray ionization source. Both positive and negative ion modes were used to analyze the sample. Polymer samples were dissolved at  $5 \cdot 10^{-4}$  M in a mixture of water/acetonitrile/methanol (1/1/1). Acetonitrile and methanol, at HPLC-MS grade, were purchased from Sigma-Aldrich (Illkirchen, Germany) and, de-ionized ultra-pure water (18 M $\Omega$ .cm resistivity) was obtained using Milli-Q Integral 3 Water System (Merck Millipore, Guyancourt, France). In the positive ion mode, LiCl was added to reach a final concentration of  $10^{-3}$  M. The solutions were introduced by direct injection and electrosprayed via a syringe pump at 60  $\mu$ L/min flow rate. The temperature of the source was set at 80 °C, nitrogen was used as desolvation gas at a flow rate of 350 L/h and a temperature of 160 °C. The electrospray voltages were set with the following main parameters: capillary at 3.0 kV, sample cone at 80 V and extraction cone at 10 V. The first hexapole was set in RF-mode only for an improved ion transmission. The first and the second quadrupole analysers were used with Low-Mass (LM) and High-Mass (HM) resolutions set to 17, or to 10 for the first quadrupole during the isolation stage in MS/MS experiments. Argon was used as a collision gas with a pressure of  $4 \cdot 10^{-3}$  mbar in the collision cell during MS/MS experiments, while vacuum was maintained at about  $4 \cdot 10^{-5}$  mbar inside the instrument (uncorrected gauge reading). The MassLynx software version 4.0 (Waters, Manchester, UK) was used for data acquisition and mass spectra processing.

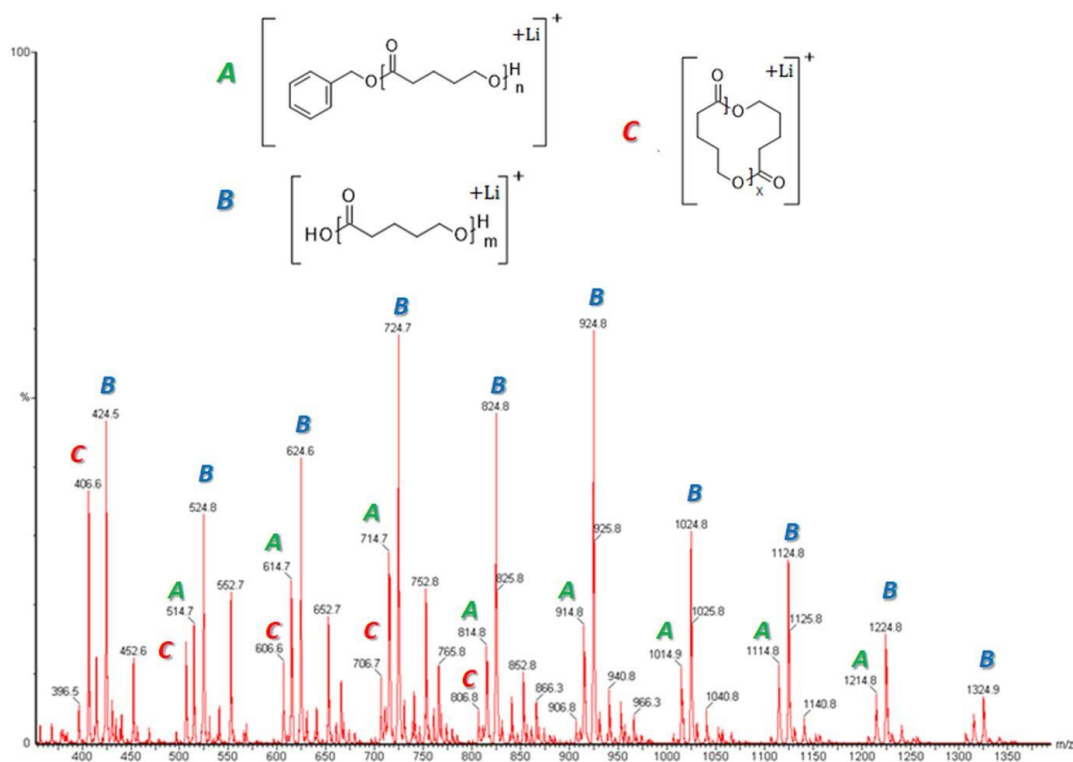

**Figure 1S.** MS spectrum obtained using ESI-QqQ instrument (in positive ion mode ) showing the hydroxyl end-groups and mono-substituted benzyl end-groups of PVL1 sample.

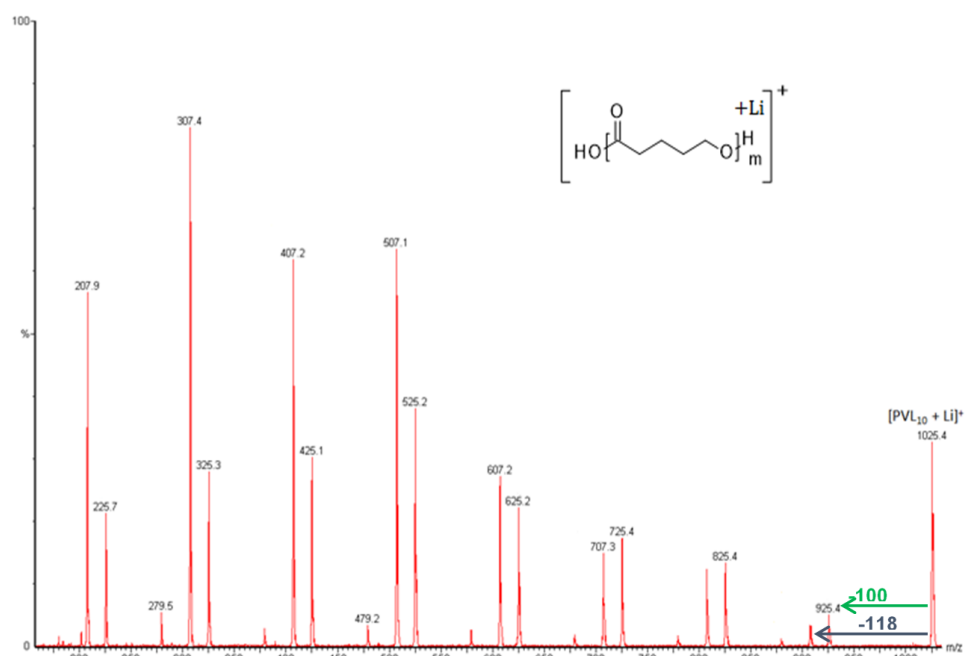

**Figure 2S.** MS/MS spectrum for lithiated cationized H-PVL10-OH ( $m/z$  1025) acquired on ESI-QqQ instrument.

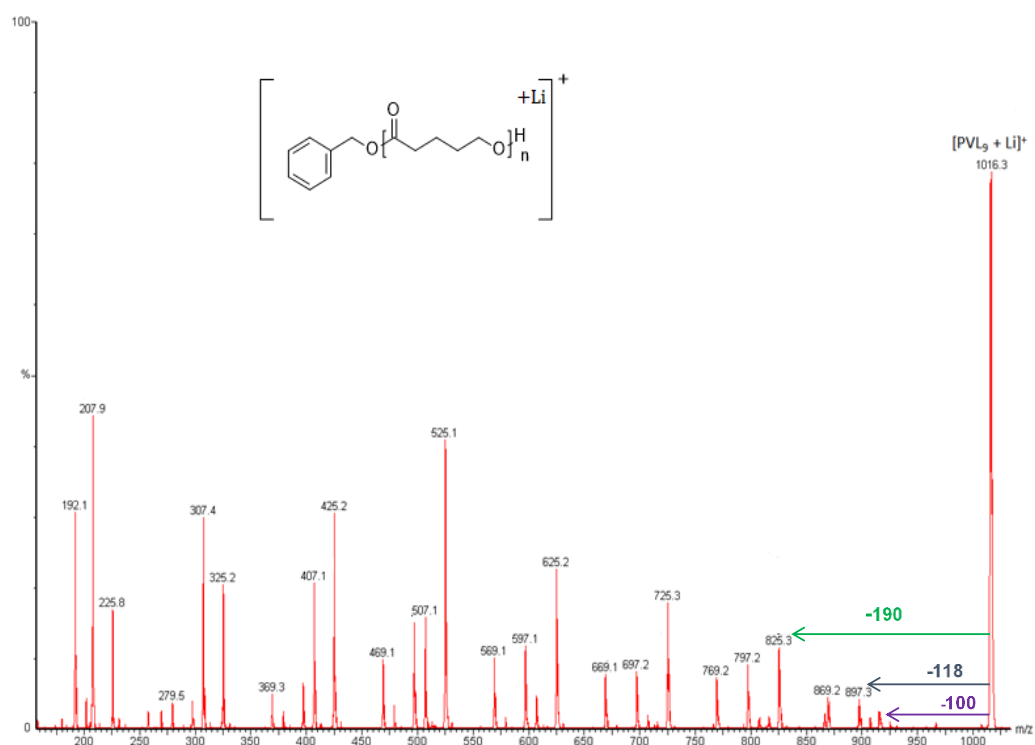

**Figure 3S.** MS/MS spectrum for lithium cationized H-PVL9-O-benzyl ( $m/z$  1016 ) acquired on ESI-QqQ instrument.
